# Supplementary material for: Occurrence of Antibiotic-Resistant Bacteria in Therapy Pools and Surrounding Surfaces
Source: MDPI journal article supplement (doi:10.3390/ijerph15122666), 2018-11-27
Supplement: s1 [file s1]

## Questionnaire for the study "Resistant pathogens in hospital swimming pools"

### 1. Information about the hospital:

|                       |  |
|-----------------------|--|
| Hospital name:        |  |
| Hospital plan number: |  |
| Street:               |  |
| Postal code:          |  |
| Number of beds:       |  |

|                 |       |                     |                    |
|-----------------|-------|---------------------|--------------------|
| Contact person: | Pool: | Hospital hygienist: | Hygiene specialist |
| Titel:          |       |                     |                    |
| Surname:        |       |                     |                    |
| Name:           |       |                     |                    |
| Telephone:      |       |                     |                    |
| Fax:            |       |                     |                    |
| E-Mail:         |       |                     |                    |

### 2. Information on the use of the bath:

Ø Visitor per day:

Ø Visitor per year:

Estimated person frequency (persons per h):

Nominal load of the bath (1 / h):

Which patient groups use the bath?

Surgical

yes ☐ no ☐

Internal medicine

yes ☐ no ☐

Others

yes ☐ no ☐

Are certain patients excluded from use?

yes ☐ no ☐

If yes, specify:

Gastroenteritis

yes ☐ no ☐

Open wounds

yes ☐ no ☐

MRE-Carrier

yes ☐ no ☐

Others

Extern users:

yes ☐ no ☐

Baby swimming:

yes ☐ no ☐

other events:

### 3. Type and number of pools (one column per pool for several pools):

|                                    |  |  |  |  |
|------------------------------------|--|--|--|--|
| Type of pool (DIN 19543-1 Point 7) |  |  |  |  |
| Construction year                  |  |  |  |  |
| Last modernisation (year)          |  |  |  |  |
| Pool size (m <sup>2</sup> )        |  |  |  |  |
| Pool volume (m <sup>3</sup> )      |  |  |  |  |
| Flow (m <sup>3</sup> /h)           |  |  |  |  |
| circulation time (min)             |  |  |  |  |
| Temperature (°C)                   |  |  |  |  |
| Ø pH value                         |  |  |  |  |

### 4. Water treatment and origin:

#### Process combination with fixed bed and precoat filters

- Flocculation - Filtration - Chlorination ☐
- Adsorption on activated carbon - Flocculation - Filtration - Chlorination ☐
- Flocculation - Multi-layer filtration with adsorptive carbon - Chlorination ☐
- Flocculation - Filtration - Adsorption on grain activated carbon - Chlorination ☐
- Flocculation - Filtration - UV-Desinfection - Chlorination ☐
- Adsorption on activated carbon --- precoat filtration --- Chlorination ☐

#### Process combination with ozonation

- Flocculation - Filtration –Ozonation- Chlorination ☐
- Flocculation - Ozonation - Multi-layer filtration – Chlorination ☐

#### Process combination with ultrafiltration ☐

filter flushing automatically ☐ manually ☐

Frequency of filter flushing:  x per ☐ Day ☐ Week ☐ Month

#### Origin filling water

- Public ☐
- Own source ☐

Filling water (m<sup>3</sup>/d):

#### Desinfection

Disinfectant:

Documentation yes ☐ no ☐

Microbiological controls according DIN 19643  
1x per month ☐  
More often ☐  
Less often ☐

Chemical controls according DIN 19643  
1x per month ☐  
More often ☐  
Less often ☐

Handling of fecal contamination or abnormal microbiological findings (e.g., high chlorination):

---

### 5. Technical details:

Automatic measuring and control technology yes ☐ no ☐

Last maintenance / calibration:  
Last filter change:

---

## 6. General hygiene

Ventilation system available yes ☐ no ☐

**Cleaning and disinfection plan available** yes ☐ no ☐

As part of the hygiene plan yes ☐ no ☐

Which cleaning devices are used?

Scrubbers and cleaning brushes yes ☐ no ☐

Mop / flat mop yes ☐ no ☐

Brush roller machine yes ☐ no ☐

high pressure cleaner yes ☐ no ☐

Wet vacuum / dry vacuum cleaners yes ☐ no ☐

Proper cleaning and disinfection of the devices after use? yes ☐ no ☐

Who carries out the purification of the cleaning utensils?

Subsequent sufficient drying guaranteed? yes ☐ no ☐

Frequency of change for cleaning utensils set in the hygiene plan? yes ☐ no ☐

Storage of cleaning utensils and equipment  
dry yes ☐ no ☐

wet yes ☐ no ☐

### Regular cleaning checks

Visual yes ☐ no ☐

Chemical (e.g. Glowcheck) yes ☐ no ☐

Mikrobiological yes ☐ no ☐

### sanitary facilities

Number of showers Women:  
Men:

Number of toilets Women:  
Men:

### Carrying out of cleaning and disinfection measures

|                    | Cleaning substance and concentration | cleaning interval (e.g., occasion, daily, weekly, etc.) | Disinfectant substance and concentration | desinfection interval (e.g., occasion, daily, weekly, etc.) |
|--------------------|--------------------------------------|---------------------------------------------------------|------------------------------------------|-------------------------------------------------------------|
| Pool floor         |                                      |                                                         |                                          |                                                             |
| Pool walls         |                                      |                                                         |                                          |                                                             |
| Spillway           |                                      |                                                         |                                          |                                                             |
| Balance water tank |                                      |                                                         |                                          |                                                             |
| Water-tank         |                                      |                                                         |                                          |                                                             |
| Seats / Furniture  |                                      |                                                         |                                          |                                                             |
| Barefoot areas     |                                      |                                                         |                                          |                                                             |
| Shower             |                                      |                                                         |                                          |                                                             |
| Toilet             |                                      |                                                         |                                          |                                                             |

---

## 7. Personnel

Qualified specialists yes ☐ no ☐

Master for baths yes ☐ no ☐

Specialist for baths yes ☐ no ☐

At least annual instruction of the cleaning staff in the cleaning and disinfection plan  
yes ☐ no ☐

Use of external cleaning personnel yes ☐ no ☐

---

## 8. Swimming aids and physiotherapy equipment

Use of swimming aids and physiotherapy equipment (e.g., noodles) yes ☐ no ☐

Regular cleaning of swimming aids and physiotherapy equipment yes ☐ no ☐

Regular disinfection of swimming aids and physiotherapy equipment yes ☐ no ☐

Storage of swimming aids and physiotherapy equipment  
dry yes ☐ no ☐  
wet yes ☐ no ☐

Comments:

Date:

Signature:
