# Supplementary material for: Occurrence of Antibiotic-Resistant Bacteria in Therapy Pools and Surrounding Surfaces
Source: Int J Environ Res Public Health. 2018 Nov 27;15(12):2666. doi: 10.3390/ijerph15122666 (PMC6313675; doi:10.3390/ijerph15122666)
Supplement: Supplementary file 1 [file ijerph-15-02666-s001.zip › S2 raw data.xlsx]

## Sheet: Isolates water
Date	Sampling Nr.	Hospital Nr.	Sampling point	Sample number	Genus	Species
2016-02-10	1	1	Backwash water	16-0039780-001-01	Leifsonia	aquatica
2016-02-10	1	1	Backwash water	16-0039780-002-01	Stenotrophomonas	maltophilia
2016-03-14	1	2	Pool water	16-0065034-001-01	Sphingobacterium	spiritivorum
2016-03-14	1	2	Pool water	16-0065034-001-02	Sphingobacterium	multivorum
2016-03-14	1	2	Balance tank	16-0065034-003-01	Sphingobacterium	spiritivorum
2016-03-14	1	2	Backwash water	16-0065034-004-01	Burkholderia	gladioli
2016-03-14	1	2	Backwash water	16-0065034-004-02	Burkholderia	gladioli
2016-06-07	1	4	Balance tank	16-0107886-023-01	Lactobacillus	sharpeae
2016-06-14	1	5	Filter water	16-0112575-022-01	Pseudomonas	mendocina
2016-06-14	1	5	Filter water	16-0112575-022-02	Cupriavidus	pauculus
2016-06-14	1	5	Filter water	16-0112575-022-03	Cupriavidus	pauculus
2016-06-14	1	5	Balance tank	16-0112575-023-01	Pseudomonas	spp
2016-06-14	1	5	Balance tank	16-0112575-023-02	Sphingomonas	paucimobilis
2016-06-14	1	5	Balance tank	16-0112575-023-03	Sphingomonas	paucimobilis
2016-06-14	1	5	Balance tank	16-0112575-023-04	Sphingomonas	paucimobilis
2016-06-14	1	5	Balance tank	16-0112575-023-05	Pseudomonas	putida
2016-06-14	1	5	Balance tank	16-0112575-023-06	Pseudomonas	spp
2016-06-14	1	5	Balance tank	16-0112575-023-07	Sphingomonas	paucimobilis
2016-06-14	1	5	Backwash water	16-0112575-024-01	Brevundimonas	vesicularis
2016-07-04	1	6	Backwash water	16-0124662-024-01	Streptococcus	pneumoniae
2016-07-04	1	6	Backwash water	16-0124662-024-02	Burkholderia	vietnamiensis
2016-07-04	1	7	Balance tank	16-0124663-023-01	Pandoraea	norimbergensis
2016-08-29	1	8	Pool water	16-0159992-021-01	Pseudomonas	spp
2016-08-29	1	8	Pool water	16-0159992-021-02	Staphylococcus	haemolyticus
2016-08-29	1	8	Pool water	16-0159992-021-03	Staphylococcus	haemolyticus
2016-08-29	1	8	Filter water	16-0159992-022-01	Pseudomonas	putida
2016-08-29	1	8	Filter water	16-0159992-022-02	Alcaligenes	faecalis
2016-08-29	1	8	Balance tank	16-0159992-023-01	Pseudomonas	aeruginosa
2016-09-13	2	5	Filter water	16-0169064-022-01	Cupriavidus	pauculus
2016-09-13	2	5	Filter water	16-0169064-022-02	Cupriavidus	pauculus
2016-09-13	2	5	Balance tank	16-0169064-023-01	Chryseobacterium	hagamense
2016-09-13	2	5	Balance tank	16-0169064-023-02	Chryseobacterium	hagamense
2016-09-13	2	5	Backwash water	16-0169064-024-01	Cupriavidus	pauculus
2016-09-13	2	5	Backwash water	16-0169064-024-02	Cupriavidus	pauculus
2016-09-19	1	11	Balance tank	16-0173173-023-01	Pseudomonas	aeruginosa
2016-09-26	3	2	Backwash water	16-0177102-024-01	Streptococcus	spp
2016-09-26	3	2	Backwash water	16-0177102-024-02	Streptococcus	spp
2016-10-04	2	6	Pool water	16-0182242-021-01	Sphingobacterium	spiritivorum
2016-10-04	2	6	Backwash water	16-0182242-024-01	Burkholderia	spp
2016-10-04	2	6	Backwash water	16-0182242-024-02	Sphingomonas	paucimobilis
2016-10-04	2	6	Backwash water	16-0182242-024-03	Ralstonia	spp
2016-10-04	2	7	Filter water	16-0182246-022-01	Achromobacter	spp
2016-10-04	2	7	Balance tank	16-0182246-023-01	Pseudomonas	spp
2016-10-04	2	7	Balance tank	16-0182246-023-02	Rothia	spp
2016-10-04	2	7	Balance tank	16-0182246-023-03	Pseudomonas	spp
2016-10-04	2	7	Backwash water	16-0182246-024-01	Pseudomonas	spp
2016-12-05	2	8	Pool water	16-0223337-021-01	Pseudomonas	spp
2016-12-05	2	8	Pool water	16-0223337-021-02	Pseudomonas	spp
2016-12-05	2	8	Pool water	16-0223337-021-03	Rhizobium	radiobacter
2016-12-05	2	8	Pool water	16-0223337-021-04	Sphingobacterium	spiritivorum
2016-12-05	2	8	Filter water	16-0223337-022-01	Pseudomonas	spp
2016-12-05	2	8	Filter water	16-0223337-022-02	Brevundimonas	vesicularis
2016-12-13	3	5	Filter water	16-0228902-022-01	Citrobacter	spp
2016-12-13	3	5	Filter water	16-0228902-022-02	Acinetobacter	spp
2016-12-13	3	5	Filter water	16-0228902-022-03	Chryseobacterium	spp
2016-12-13	3	5	Filter water	16-0228902-022-04	Cupriavidus	pauculus
2016-12-13	2	9	Balance tank	16-0228924-023-01	Staphylococcus	haemolyticus
2016-12-13	2	9	Backwash water	16-0228924-024-01	Pseudomonas	oryzihabitans
2016-12-13	2	9	Backwash water	16-0228924-024-02	Brevundimonas	vesicularis
2016-12-13	2	9	Backwash water	16-0228924-024-03	Cupriavidus	pauculus
2016-12-13	2	9	Backwash water	16-0228924-024-04	Staphylococcus	haemolyticus
2017-01-18	2	10	Filter water	17-0009495-022-01	Pseudomonas	aeruginosa
2017-01-18	2	10	Filter water	17-0009495-022-02	Cupriavidus	metallidurans
2017-01-18	2	11	Balance tank	17-0009506-023-01	Pseudomonas	aeruginosa
2017-01-18	2	11	Balance tank	17-0009506-023-02	Sphingomonas	paucimobilis
2016-08-29	1	8	Filter water	17-0011343-022-01	Pseudomonas	spp
2016-08-29	1	8	Filter water	17-0011343-022-02	Sphingomonas	paucimobilis
2016-08-29	1	8	Filter water	17-0011343-022-03	Sphingomonas	paucimobilis
2016-08-29	1	8	Filter water	17-0011343-022-04	Pseudomonas	spp
2017-01-24	1	8	Backwash water	17-0011343-024-01	Pseudomonas	mendocina
2017-01-24	1	8	Backwash water	17-0011343-024-02	Sphingomonas	paucimobilis
2017-01-24	1	8	Backwash water	17-0011343-024-04	Comamonas	testosteroni
2017-01-24	1	8	Backwash water	17-0011343-024-05	Sphingobacterium	spiritivorum
2017-01-24	1	8	Backwash water	17-0011343-024-06	Pseudomonas	spp
2017-01-24	1	8	Backwash water	17-0011343-024-08	Pseudomonas	mendocina
2017-01-31	4	5	Filter water	17-0016593-022-01	Cupriavidus	pauculus
2017-01-31	4	5	Backwash water	17-0016593-024-01	Shewanella	spp
2017-01-31	4	5	Backwash water	17-0016593-024-02	Cupriavidus	pauculus
2017-01-31	3	9	Pool water	17-0016598-021-01	Staphylococcus	hominis
2017-01-31	3	9	Backwash water	17-0016598-024-01	Pseudomonas	oryzihabitans
2017-01-31	3	9	Backwash water	17-0016598-024-02	Staphylococcus	haemolyticus
2017-01-31	3	9	Backwash water	17-0016598-024-03	Paenibacillus	glucanolyticus
2017-01-31	3	9	Backwash water	17-0016598-024-04	Staphylococcus	hominis
2017-02-13	2	8	Balance tank	17-0025368-023-01	Pseudomonas	otitidis
2017-02-13	2	8	Balance tank	17-0025368-023-02	Pseudomonas	spp
2017-02-20	4	7	Filter water	17-0029944-022-01	Sphingomonas	spp
2017-02-20	4	7	Balance tank	17-0029944-023-01	Achromobacter	spp
2017-02-20	4	7	Backwash water	17-0029944-024-01	Brevundimonas	vesicularis
2017-02-20	4	7	Backwash water	17-0029944-024-02	Rhizobium	spp
2017-02-20	4	7	Backwash water	17-0029944-024-03	Staphylococcus	epidermidis
2017-02-20	4	7	Backwash water	17-0029944-024-04	Pseudomonas	oryzihabitans
2017-03-07	3	10	Backwash water	17-0034052-023-01	Sphingomonas	paucimobilis
2017-03-07	3	10	Backwash water	17-0034052-024-01	Sphingomonas	paucimobilis
2017-03-13	4	3	Balance tank	17-0042785-023-01	Moraxella	spp
2017-03-28	4	9	Pool water	17-0052163-021-01	Paenibacillus	spp
2017-03-28	4	9	Pool water	17-0052163-021-02	Staphylococcus	epidermidis
2017-03-28	4	9	Backwash water	17-0052163-024-02	Rhizobium	radiobacter
2017-03-28	4	9	Backwash water	17-0052163-024-03	Staphylococcus	haemolyticus
2017-04-04	4	10	Pool water	17-0057510-021-01	Kocuria	spp
2017-04-04	4	10	Backwash water	17-0057510-024-01	Sphingomonas	paucimobilis
2017-04-04	4	10	Backwash water	17-0057510-024-02	Sphingomonas	paucimobilis
2017-04-04	3	11	Filter water	17-0057513-022-01	Cupriavidus	spp

## Sheet: Isolates surface
Date	Sampling Nr.	Hospital Nr.	Sampling point	Sample number	Genus	Species
2016-03-14	1	10	2	16-0065034-006-01	Staphylococcus	haemolyticus
2016-03-14	1	2	3	16-0065034-007-01	Staphylococcus	haemolyticus
2016-03-14	1	2	7	16-0065034-011-01	Pseudomonas	stutzeri
2016-03-14	1	2	7	16-0065034-011-02	Pseudomonas	mendocina
2016-03-14	1	2	7	16-0065034-011-03	Acinetobacter	lwoffii/haemolyticus
2016-03-14	1	2	7	16-0065034-011-04	Acinetobacter	spp
2016-03-14	1	2	7	16-0065034-011-05	Enterococcus	faecalis
2016-03-14	1	2	9	16-0065034-013-01	Enterobacter	cloacae
2016-03-14	1	2	9	16-0065034-013-02	Achromobacter	spp
2016-03-14	1	2	9	16-0065034-013-03	Pseudomonas	putida
2016-03-14	1	2	9	16-0065034-013-04	Pseudomonas	putida
2016-03-14	1	2	9	16-0065034-013-05	Enterobacter	cloacae
2016-05-09	2	1	5	16-0091214-015-02	Staphylococcus	haemolyticus
2016-06-01	1	3	3	16-0104438-013-02	Brevundimonas	diminuta
2016-06-01	1	3	3	16-0104438-013-03	Brevundimonas	diminuta
2016-06-01	1	3	3	16-0104438-013-04	Cuprividus	respiraculi
2016-06-01	1	3	3	16-0104438-013-05	Brevundimonas	diminuta
2016-06-01	1	3	3	16-0104438-013-06	Pantoe	spp
2016-06-01	1	3	6	16-0104438-016-01	Staphylococcus	haemolyticus
2016-06-01	1	3	6	16-0104438-016-03	Staphylococcus	haemolyticus
2016-06-01	1	3	8	16-0104438-018-01	Staphylococcus	succinus
2016-06-01	1	3	8	16-0104438-018-02	Staphylococcus	succinus
2016-06-06	1	4	1	16-0107886-011-01	Staphylococcus	epidermidis
2016-06-06	1	4	2	16-0107886-012-01	Streptococcus	pyogenes
2016-06-06	1	4	2	16-0107886-012-02	Staphylococcus	epidermidis
2016-06-06	1	4	5	16-0107886-015-01	Bacillus	cereus
2016-06-06	1	4	6	16-0107886-016-01	Bacillus	pumilis
2016-06-06	1	4	6	16-0107886-016-02	Pseudomonas	oryzhabitans
2016-06-06	1	4	7	16-0107886-017-01	Pseudomonas	oryzhabitans
2016-06-06	1	4	7	16-0107886-017-02	Pseudomonas	oryzhabitans
2016-06-06	1	4	7	16-0107886-017-03	Pseudomonas	oryzhabitans
2016-06-14	1	9	2	16-0112575-012-01	Staphylococcus	haemolyticus
2016-06-14	1	5	5	16-0112575-015-01	Pseudomonas	stutzeri
2016-06-14	1	5	5	16-0112575-015-02	Staphylococcus	epidermidis
2016-06-14	1	5	5	16-0112575-015-05	Bacillus	subtilis
2016-06-14	1	5	5	16-0112575-015-03	Bacillus	subtilis
2016-06-14	1	5	5	16-0112575-015-04	Staphylococcus	epidermidis
2016-06-14	1	5	7	16-0112575-017-01	Stenotrophomonas	maltophilia
2016-06-14	1	5	7	16-0112575-017-03	Staphylococcus	epidermidis
2016-06-14	1	5	7	16-0112575-017-04	Stenotrophomonas	maltophilia
2016-06-14	1	5	7	16-0112575-017-05	Microbacterium	paraoxydans
2016-06-14	1	5	9	16-0112575-019-01	Streptococcus	mitis
2016-06-14	1	5	9	16-0112575-019-02	not determined
2016-06-14	1	5	9	16-0112575-019-03	Microbacterium	paraoxydans
2016-06-14	1	5	9	16-0112575-019-04	Microbacterium	paraoxydans
2016-06-28	2	2	2	16-0121357-012-02	Staphylococcus	haemolyticus
2016-06-28	2	2	4	16-0121357-014-01	Pseudomonas	aeruginosa
2016-06-28	2	2	4	16-0121357-014-02	Pseudomonas	aeruginosa
2016-06-28	2	2	4	16-0121357-014-03	Achromobacter	xylosoxidans
2016-06-28	2	2	4	16-0121357-014-04	Enterobacter	cloacae
2016-06-28	2	2	4	16-0121357-014-06	Achromobacter	xylosoxidans
2016-06-28	2	2	9	16-0121357-019-01	Bacillus	thuringiensis
2016-07-04	1	6	9	16-0124662-019-01	Stenotrophomonas	maltophilia
2016-07-04	1	6	9	16-0124662-019-02	Achromobacter	insolitus
2016-07-04	1	6	9	16-0124662-019-03	Stenotrophomonas	maltophilia
2016-07-04	1	6	9	16-0124662-019-04	Achromobacter	spanius
2016-07-04	1	6	9	16-0124662-019-05	Pseudomonas	mendocina
2016-08-02	3	1	6	16-0144405-016-01	staphylococcus	haemolyticus
2016-08-02	3	1	7	16-0144405-017-01	Pseudomonas	putida
2016-08-02	3	1	7	16-0144405-017-02	Pseudomonas	putida
2016-08-23	2	3	5	16-0156509-015-01	Staphylococcus	haemolyticus
2016-08-29	1	8	1	16-0159992-011-01	Pseudomonas	aeruginosa
2016-08-29	1	8	1	16-0159992-011-02	Pseudomonas	aeruginosa
2016-08-29	1	8	4	16-0159992-014-01	Staphylococcus	epidermidis
2016-08-29	1	8	5	16-0159992-015-01	Staphylococcus	haemolyticus
2016-08-29	1	8	6	16-0159992-016-01	Stenotrophomonas	maltophilia
2016-08-29	1	8	6	16-0159992-016-02	Stenotrophomonas	maltophilia
2016-08-29	1	8	8	16-0159992-018-01	Achromobacter	spp
2016-08-29	1	8	8	16-0159992-018-02	stenotrophomonas	maltophilia
2016-08-29	1	8	8	16-0159992-018-04	Bacillus	cereus
2016-08-29	1	8	8	16-0159992-018-05	Pseudomonas	spp
2016-08-29	1	8	8	16-0159992-018-06	Stenotrophomonas	maltophilia
2016-08-29	2	4	1	16-0159993-011-01	Bacillus	spp
2016-08-29	2	4	1	16-0159993-011-02	Staphylococcus	hominis
2016-08-29	2	4	7	16-0159993-017-01	Pseudomonas	oryzhabitans
2016-08-29	2	4	9	16-0159993-019-01	Pseudomonas	oryzhabitans
2016-08-29	2	4	9	16-0159993-019-02	Staphylococcus	warneri
2016-09-13	2	5	6	16-0169064-016-01	Pseudomonas	aeruginosa
2016-09-13	2	5	6	16-0169064-016-02	Pseudomonas	aeruginosa
2016-09-13	2	5	6	16-0169064-016-03	Burkholderia	gladioli
2016-09-13	2	5	6	16-0169064-016-04	Pseudomonas	aeruginosa
2016-09-13	1	9	7	16-0169070-017-01	Pseudomonas	mendocina
2016-09-13	1	9	7	16-0169070-017-02	Stenotrophomonas	maltophilia
2016-09-13	1	9	7	16-0169070-017-03	Brevundimonas	diminuta
2016-09-13	1	9	7	16-0169070-017-04	Bacillus	oleronius
2016-09-13	1	9	8	16-0169070-018-01	Pseudomonas	aeruginosa
2016-09-13	1	9	9	16-0169070-019-01	Brevundimonas	diminuta
2016-09-13	1	9	9	16-0169070-019-02	Microbacterium	paraoxydans
2016-09-19	1	10	2	16-0173171-012-01	Paenibacillus	spp
2016-09-19	1	11	2	16-0173173-012-01	Pseudomonas	antarctica
2016-09-19	1	11	2	16-0173173-012-02	Staphylococcus	haemolyticus
2016-09-19	1	11	2	16-0173173-012-03	Staphylococcus	haemolyticus
2016-09-19	1	11	2	16-0173173-012-04	Staphylococcus	haemolyticus
2016-09-19	1	11	5	16-0173173-015-01	Bacillus	spp
2016-09-19	1	11	5	16-0173173-015-02	Bacillus	spp
2016-09-19	1	11	5	16-0173173-015-03	Bacillus	spp
2016-09-19	1	11	6	16-0173173-016-01	Staphylococcus	haemolyticus
2016-09-19	1	11	6	16-0173173-016-02	Staphylococcus	haemolyticus
2016-09-19	1	11	6	16-0173173-016-03	Staphylococcus	haemolyticus
2016-09-19	1	11	7	16-0173173-017-01	Bacillus	thuringiensis
2016-09-19	1	11	7	16-0173173-017-02	Bacillus	thuringiensis
2016-09-19	1	11	7	16-0173173-017-03	Bacillus	spp
2016-09-26	3	2	1	16-0177102-011-01	Staphylococcus	haemolyticus
2016-09-26	3	2	3	16-0177102-013-01	Pseudomonas	spp
2016-09-26	3	2	3	16-0177102-013-02	Pseudomonas	spp
2016-09-26	3	2	3	16-0177102-013-03	Pseudomonas	spp
2016-09-26	3	2	3	16-0177102-013-04	Microbacterium	spp
2016-09-26	3	2	4	16-0177102-014-01	Staphylococcus	aureus
2016-09-26	3	2	4	16-0177102-014-02	Staphylococcus	epidermidis
2016-09-26	3	2	6	16-0177102-016-01	Staphylococcus	epidermidis
2016-09-26	3	2	7	16-0177102-017-01	Pseudomonas	aeruginosa
2016-09-26	3	2	7	16-0177102-017-02	Pseudomonas	aeruginosa
2016-09-26	3	2	7	16-0177102-017-03	Sphingobacterium	spp
2016-09-26	3	2	7	16-0177102-017-04	Brevundimonas	diminuta
2016-09-26	3	2	7	16-0177102-017-05	Sphingobacterium	spp
2016-09-26	3	2	7	16-0177102-017-06	Staphylococcus	haemolyticus
2016-09-26	3	2	7	16-0177102-017-07	Staphylococcus	haemolyticus
2016-09-26	3	2	7	16-0177102-017-08	Lactobacillus	spp
2016-09-26	3	2	9	16-0177102-019-01	Staphylococcus	epidermidis
2016-09-26	3	2	9	16-0177102-019-02	Staphylococcus	epidermidis
2016-09-26	3	2	9	16-0177102-019-03	Enterococcus	faecalis
2016-10-04	2	6	1	16-0182242-011-01	Pasteurella	spp
2016-10-04	2	6	1	16-0182242-011-02	Paenibacillus	spp
2016-10-04	2	6	2	16-0182242-012-01	Staphylococcus	spp
2016-10-04	2	6	6	16-0182242-016-01	Shewanella	putrefaciens
2016-10-04	2	6	7	16-0182242-017-01	Achromobacter	spp
2016-10-04	2	6	7	16-0182242-017-02	Achromobacter	spp
2016-10-04	2	6	7	16-0182242-017-05	Achromobacter	spp
2016-10-04	2	6	7	16-0182242-017-06	Ochrobactrum	antropi
2016-10-04	2	6	7	16-0182242-017-07	Enterobacter	Cloacae
2016-10-04	2	6	7	16-0182242-017-03	Achromobacter	spp
2016-10-04	2	6	9	16-0182242-019-01	Ochrobactrum	spp
2016-10-04	2	6	9	16-0182242-019-02	Stenotrophomonas	maltophilia
2016-10-04	2	6	9	16-0182242-019-03	Stenotrophomonas	maltophilia
2016-10-04	2	6	9	16-0182242-019-04	Ochrobactrum	anthropi
2016-10-04	2	6	9	16-0182242-019-05	Ochrobactrum	anthropi
2016-10-04	2	7	2	16-0182246-012-01	Staphylococcus	epidermidis
2016-10-04	2	7	2	16-0182246-012-02	Bacillus	spp
2016-10-04	2	7	3	16-0182246-013-01	Staphylococcus	epidermidis
2016-10-04	2	7	5	16-0182246-015-01	Staphylococcus	epidermidis
2016-10-04	2	7	7	16-0182246-017-01	Achromobacter	spp
2016-10-04	2	7	7	16-0182246-017-02	Achromobacter	spp
2016-11-14	4	2	3	16-0208370-013-01	Ochrobactrum	anthropi
2016-11-14	4	2	3	16-0208370-013-02	Ochrobactrum	anthropi
2016-11-14	4	2	9	16-0208370-019-01	Morganella	morganii
2016-11-14	4	1	1	16-0208377-011-01	Sphingomonas	paucimobilis
2016-11-14	4	1	2	16-0208377-012-01	Staphylococcus	epidermidis
2016-11-14	4	1	7	16-0208377-017-01	Dermacoccus	spp
2016-11-28	3	3	8	16-0218455-018-01	Pseudomonas	putida
2016-11-28	3	3	8	16-0218455-018-02	Pseudomonas	putida
2016-11-28	3	3	8	16-0218455-018-03	Pseudomonas	putida
2016-11-28	3	3	8	16-0218455-018-04	Pseudomonas	putida
2016-12-05	3	4	4	16-0223335-014-01	Staphylococcus	epidermidis
2016-12-05	3	4	6	16-0223335-016-01	Stenotrophomonas	maltophilia
2016-12-05	3	4	6	16-0223335-016-02	Stenotrophomonas	maltophilia
2016-12-05	3	4	9	16-0223335-019-01	Stenotrophomonas	maltophilia
2016-12-05	3	4	9	16-0223335-019-02	Stenotrophomonas	maltophilia
2016-12-05	3	4	9	16-0223335-019-03	Stenotrophomonas	maltophilia
2016-12-05	3	4	9	16-0223335-019-04	Stenotrophomonas	maltophilia
2016-12-05	3	4	9	16-0223335-019-05	Stenotrophomonas	maltophilia
2016-12-05	3	4	9	16-0223335-019-06	Stenotrophomonas	maltophilia
2016-12-05	2	8	1	16-0223337-011-01	Brevundimonas	vesicularis
2016-12-05	2	8	4	16-0223337-014-01	Staphylococcus	epidermidis
2016-12-05	2	8	8	16-0223337-018-01	Stenotrophomonas	maltrophilia
2016-12-05	2	8	8	16-0223337-018-02	Stenotrophomonas	maltophilia
2016-12-05	2	8	8	16-0223337-018-03	Stenotrophomonas	maltrophilia
2016-12-05	2	8	8	16-0223337-018-04	Bacillus	spp
2016-12-13	3	5	1	16-0228902-011-01	Brevundimonas	vesicularis
2016-12-13	3	5	1	16-0228902-011-02	Microbacterium	spp
2016-12-13	3	5	2	16-0228902-012-01	Bacillus	spp
2016-12-13	3	5	2	16-0228902-012-02	staphylococcus	haemolyticus
2016-12-13	3	5	3	16-0228902-013-01	Pseudomonas	spp
2016-12-13	3	5	3	16-0228902-013-02	Pseudomonas	spp
2016-12-13	2	9	4	16-0228924-014-01	Staphylococcus	spp
2016-12-13	2	9	7	16-0228924-017-01	staphylococcus	haemolyticus
2016-12-13	2	9	7	16-0228924-017-02	Proteus	mirabilis
2016-12-13	2	9	8	16-0228924-018-01	Pseudomonas	aeruginosa
2016-12-13	2	9	8	16-0228924-018-02	Achromobacter	spp
2016-12-13	2	9	8	16-0228924-018-03	Microbacterium	spp
2016-12-13	2	9	8	16-0228924-018-04	Microbacterium	spp
2016-12-13	2	9	8	16-0228924-018-05	Microbacterium	spp
2016-12-13	2	9	8	16-0228924-018-06	Microbacterium	spp
2016-12-13	2	9	9	16-0228924-019-01	Pseudomonas	aeruginosa
2016-12-13	2	9	9	16-0228924-019-02	Pseudomonas	aeruginosa
2016-12-13	2	9	9	16-0228924-019-03	Stenotrophomonas	maltophilia
2016-12-13	2	9	9	16-0228924-019-04	Pseudomonas	aeruginosa
2017-01-09	3	7	5	17-0002633-015-01	Staphylococcus	epidermidis
2017-01-09	3	7	5	17-0002633-015-04	Klebsiella	oxytoca
2017-01-09	3	7	5	17-0002633-015-03	Staphylococcus	hominis
2017-01-09	3	7	5	17-0002633-015-05	Staphylococcus	epidermidis
2017-01-09	3	7	6	17-0002633-016-03	Staphylococcus	epidermidis
2017-01-09	3	7	8	17-0002633-018-01	Stenotrophomonas	maltophilia
2017-01-09	3	7	8	17-0002633-018-05	Serratia	marcescens
2017-01-09	3	7	8	17-0002633-018-02	Stenotrophomonas	maltophilia
2017-01-09	3	7	8	17-0002633-018-03	Ochrobactrum	anthropi
2017-01-09	3	7	9	17-0002633-019-01	Staphylococcus	haemolyticus
2017-01-18	2	10	1	17-0009495-011-01	Staphylococcus	spp
2017-01-18	2	10	6	17-0009495-016-01	Staphylococcus	epidermidis
2017-01-18	2	10	7	17-0009495-017-01	Staphylococcus	haemolyticus
2017-01-18	2	11	6	17-0009506-016-01	Microbacterium	aurum
2017-01-18	2	11	7	17-0009506-017-01	Staphylococcus	hominis
2017-01-23	1	8	1	17-0011343-011-01	Pseudomonas	fulva
2017-01-23	1	8	1	17-0011343-011-02	Pseudomonas	spp
2017-01-23	1	8	3	17-0011343-013-01	Pandoraea	spp
2017-01-23	1	8	3	17-0011343-013-02	Alcaligenes	spp
2017-01-23	1	8	3	17-0011343-013-04	Pandoraea	pnomenusa
2017-01-23	1	8	3	17-0011343-013-05	Pseudomonas	spp
2017-01-23	1	8	7	17-0011343-017-01	Pseudomonas	aeruginosa
2017-01-23	1	8	7	17-0011343-017-02	Stenotrophomonas	maltophilia
2017-01-23	1	8	7	17-0011343-017-03	Chryseobacterium	gleum
2017-01-23	1	8	7	17-0011343-017-04	Stenotrophomonas	maltophilia
2017-01-23	1	8	7	17-0011343-017-05	staphylococcus	petrasii
2017-01-23	1	8	7	17-0011343-017-06	Enterobacter	cloacae
2017-01-23	1	8	7	17-0011343-017-07	Microbacterium	paraoxydans
2017-01-31	4	5	1	17-0016593-011-01	Staphylococcus	epidermidis
2017-01-31	4	5	3	17-0016593-013-01	Pseudomonas	spp
2017-01-31	4	5	3	17-0016593-013-02	Pseudomonas	spp
2017-01-31	4	5	3	17-0016593-013-03	Empedobacter	brevis
2017-01-31	4	5	3	17-0016593-013-04	Pseudomonas	spp
2017-01-31	4	5	9	17-0016593-019-01	Pseudomonas	spp
2017-01-31	4	5	9	17-0016593-019-03	Stenotrophomonas	maltophilia
2017-01-31	4	5	9	17-0016593-019-04	Brevundimonas	diminuta
2017-01-31	4	5	9	17-0016593-019-05	Bacillus	cereus
2017-01-31	3	9	2	17-0016598-012-01	Pseudomonas	spp
2017-01-31	3	9	2	17-0016598-012-02	Stenotrophomonas	maltophilia
2017-01-31	3	9	2	17-0016598-012-03	Ochrobactrum	anthropi
2017-01-31	3	9	7	17-0016598-017-01	Pseudomonas	fulva
2017-01-31	3	9	7	17-0016598-017-02	Pseudomonas	fulva
2017-01-31	3	9	8	17-0016598-018-01	Pseudomonas	aeruginosa
2017-01-31	3	9	8	17-0016598-018-02	Pseudomonas	aeruginosa
2017-01-31	3	9	9	17-0016598-019-01	Staphylococcus	haemolyticus
2017-02-13	4	4	1	17-0025367-011-01	Staphylococcus	spp
2017-02-13	4	4	2	17-0025367-012-01	staphylococcus	spp
2017-02-13	4	4	6	17-0025367-016-02	Stenotrophomonas	maltophilia
2017-02-13	4	4	6	17-0025367-016-04	Stenotrophomonas	maltophilia
2017-02-13	4	4	6	17-0025367-016-06	Stenotrophomonas	maltophilia
2017-02-13	2	8	1	17-0025368-011-01	Pseudomonas	putida
2017-02-13	2	8	1	17-0025368-011-02	Staphylococcus	haemolyticus
2017-02-13	2	8	2	17-0025368-012-01	Staphylococcus	spp
2017-02-13	2	8	2	17-0025368-012-02	Staphylococcus	epidermidis
2017-02-13	2	8	3	17-0025368-013-01	Pseudomonas	spp
2017-02-13	2	8	3	17-0025368-013-02	Pseudomonas	spp
2017-02-13	2	8	4	17-0025368-014-01	Staphylococcus	epidermidis
2017-02-13	2	8	5	17-0025368-015-01	Paenibacillus	spp
2017-02-13	2	8	7	17-0025368-017-01	Pseudomonas	spp
2017-02-13	2	8	7	17-0025368-017-02	Stenotrophomonas	maltophilia
2017-02-13	2	8	7	17-0025368-017-04	Stenotrophomonas	maltophilia
2017-02-13	2	8	7	17-0025368-017-05	Brevundimonas	spp
2017-02-13	2	8	7	17-0025368-017-07	Staphylococcus	spp
2017-02-13	2	8	7	17-0025368-017-08	Stenotrophomonas	maltophilia
2017-02-13	2	8	7	17-0025368-017-09	Staphylococcus	epidermidis
2017-02-20	4	7	2	17-0029944-012-01	Staphylococcus	haemolyticus
2017-02-20	4	7	3	17-0029944-013-01	Moraxella	spp
2017-02-20	4	7	4	17-0029944-014-01	Staphylococcus	epidermidis
2017-02-20	4	7	5	17-0029944-015-01	Staphylococcus	capitis
2017-02-20	4	7	5	17-0029944-015-02	Staphylococcus	epidermidis
2017-02-20	4	7	6	17-0029944-016-01	Staphylococcus	epidermidis
2017-02-20	4	7	7	17-0029944-017-01	Pseudomonas	nitroreducens
2017-02-20	4	7	7	17-0029944-017-02	Stenotrophomonas	maltophilia
2017-02-20	4	7	7	17-0029944-017-03	Brevundimonas	spp
2017-02-20	4	7	7	17-0029944-017-04	Pantoea	agglomerans
2017-02-20	4	7	7	17-0029944-017-05	Brevundimonas	diminuta
2017-03-07	3	10	1	17-0034052-011-01	Bacillus	spp
2017-03-07	3	10	2	17-0034052-012-01	Paenibacillus	macerans
2017-03-07	3	10	2	17-0034052-012-02	Bacillus	spp
2017-03-07	3	10	3	17-0034052-013-01	Bacillus	spp
2017-03-07	3	10	4	17-0034052-014-01	Bacillus	spp
2017-03-07	3	10	5	17-0034052-015-01	Staphylococcus	epidermidis
2017-03-07	3	10	7	17-0034052-017-01	Bacillus	spp
2017-03-07	3	10	7	17-0034052-017-02	Bacillus	spp
2017-03-07	3	10	9	17-0034052-019-01	Bacillus	cereus
2017-03-13	4	3	2	17-0042785-012-01	Staphylococcus	hominis
2017-03-13	4	3	3	17-0042785-013-01	Pseudomonas	aeruginosa
2017-03-13	4	3	3	17-0042785-013-02	Pseudomonas	aeruginosa
2017-03-13	4	3	3	17-0042785-013-04	Achromobacter	spp
2017-03-13	4	3	3	17-0042785-013-05	Achromobacter	spp
2017-03-13	4	3	7	17-0042785-017-01	Achromobacter	spp
2017-03-13	4	3	7	17-0042785-017-02	Achromobacter	spp
2017-03-27	4	9	2	17-0052163-012-01	Sphingomonas	paucimobilis
2017-03-27	4	9	2	17-0052163-012-02	Microbacterium	paraoxidans
2017-03-27	4	9	2	17-0052163-012-03	Microbacterium	paraoxidans
2017-03-27	4	9	5	17-0052163-015-01	Staphylococcus	epidermidis
2017-03-27	4	9	7	17-0052163-017-01	Pseudomonas	oryzihabitans
2017-03-27	4	9	7	17-0052163-017-02	Staphylococcus	haemolyticus
2017-03-27	4	9	9	17-0052163-019-01	Pseudomonas	aeruginosa
2017-03-27	4	9	9	17-0052163-019-02	Pseudomonas	aeruginosa
2017-03-27	4	9	9	17-0052163-019-05	Achromobacter	spp
2017-03-27	4	9	9	17-0052163-019-07	Achromobacter	spp
2017-04-04	4	10	1	17-0057510-011-01	Paenibacillus	spp
2017-04-04	4	10	6	17-0057510-016-01	Stenotrophomonas	maltophilia
2017-04-04	4	10	6	17-0057510-016-02	Stenotrophomonas	maltophilia
2017-04-04	4	10	6	17-0057510-016-03	Stenotrophomonas	maltophilia
2017-04-04	4	10	6	17-0057510-016-04	Stenotrophomonas	maltophilia
2017-04-04	4	10	6	17-0057510-016-07	Microbacterium	paraoxydans
2017-04-04	4	10	7	17-0057510-017-01	Bacillus	cereus
2017-04-03	2	11	3	17-0057513-013-01	Staphylococcus	hominis
2017-04-04	3	11	4	17-0057513-014-01	Staphylococcus	epidermidis
2017-04-04	3	11	6	17-0057513-016-01	Sphingobacterium	spiritivorum
2017-04-04	3	11	6	17-0057513-016-02	Sphingobacterium	multivorum
2017-04-04	3	11	6	17-0057513-016-03	Microbacterium	spp
2017-04-04	3	11	7	17-0057513-017-01	Stenotrophomonas	maltophilia
2017-04-04	3	11	7	17-0057513-017-02	Stenotrophomonas	maltophilia
2017-04-04	3	11	7	17-0057513-017-03	Sphingomonas	paucimobilis
2017-04-04	3	11	7	17-0057513-017-04	Brevundimonas	spp
2017-04-04	3	11	7	17-0057513-017-05	Filifactor	spp
2017-04-04	3	11	7	17-0057513-017-06	Microbacterium	spp
2017-04-04	3	11	7	17-0057513-017-09	Pseudomonas	spp
